# Supplementary material
Source: publisher figshare collection journal article supplement (https://gsajournals.figshare.com/ndownloader/files/14964707)
Supplement: Supplementary file 1 [file 14964707]

## Sheet: Summary
SRA ID	Number_of_samples	Stranded	Number_of_spots	Instrument	Total_Reads	Reads_Survived(Trimomatic step)	Polyadenylated_Reads	Uniquely_aligned_reads	Number_of_cleavage_sites
SRP014792	8	No	Single	Illumina Genome Analyser	297488492	284566847	5456	5147	4594
SRP068070	27	No	Paired	Illumina HiSeq 2000	905768530	905698183	44498	43356	24355
SRP032921	24	No	Single	Illumina HiSeq 2000	687991444	658248221	7350	7076	6140
SRP075906	7	No	Single	Illumina HiSeq 2500	149815125	149253228	22984	10713	8414
SRP058076	8	No	Paired	Illumina HiSeq 2000	87195982	87195042	2540	2498	2399
SRP006463	14	No	Single	Illumina Genome Analyser	317627369	297433372	1173	1113	999
SRP059655	2	No	Paired	Illumina HiSeq 2500	141772837	141764386	4177	3477	2592
SRP062027	94	No	Single	Illumina HiSeq 2000	1481388516	1464751585	12879	12328	8644
SRP074850	6	No	Paired	Illumina HiSeq 2000	84255529	84124616	1164	547	475
SRP098550	18	No	Single	Illumina HiSeq 2500	182126788	181621910	560	445	249
SRP006965	12	No	Paired	Illumina Genome Analyser	315285758	313318636	924316	567068	304472
SRP077762	3	No	Paired	Illumina HiSeq 2000	247270924	246580722	623037	613195	162567
SRP037558	1	No	Paired	Illumina HiSeq 2000	15694676	15687086	19176	18824	10642
SRP029238	68	Yes	Single	Illumina HiSeq 2500	1711421421	1583001513	3388	3238	3061
SRP001844	4	No	Single	Illumina Genome Analyser	25844607	11942728	1901	1419	1322
SRP118717	3	No	Paired	Illumina HiSeq 2000	163313626	161847468	459261	446936	135316
SRP109545	28	No	Paired	Illumina HiSeq 2500	1031794262	1031597030	69485	2255	1659
SRP043224	4	No	Single	Illumina Genome Analyser	24300211	24126570	22749	22129	16542
SRP073222	2	No	Paired+Single	Illumina HiSeq 2500	37171435	37101639	2402	2349	1996
SRP101358	8	Yes	Single	Illumina Genome Analyser	80344950	78556008	239	201	117
SRP116297	6	No	Paired	Illumina HiSeq 2500	276745888	276743740	35441	34784	22734
SRP079373	24	No	Paired	Illumina HiSeq 4000	374502263	374450445	6769	4999	2621
SRP105764	18	No	Paired	Illumina HiSeq 1000	706386428	705860505	24793554	19892412	3654916
SRP060587	12	No	Paired	Illumina HiSeq 2000	139496934	139496516	702	594	536
					9485003995	9254967996	27065201	21697103
